# Supplementary material for: Cytological, Physiological, and Transcriptomic Analyses of the Leaf Color Mutant Yellow Leaf 20 (yl20) in Eggplant (Solanum melongena L.)
Source: MDPI journal article supplement (doi:10.3390/plants13060855), 2024-03-15

**Supplementary Figure S1** The PCA analysis of the leaf-color mutant *yl20* and the WT in eggplant. YC, yellow leaves of *yl20* in the cotyledon stage. YE, yellow young leaves of *yl20* in the euphylla stage. GC, normal green leaves of WT in cotyledon stage. GE, normal green leaves of WT in the euphylla stage.

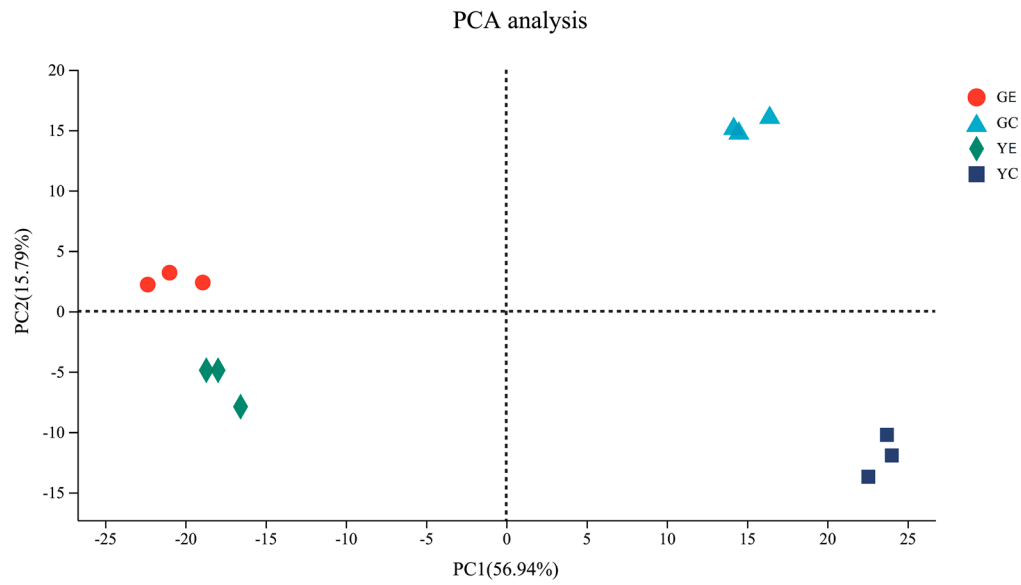

**Supplementary Figure S2** qRT-PCR confirmation of DEGs identified by transcriptome analysis of the leaf-color mutant *y/20* and the WT in eggplant. YC, yellow leaves of *y/20* in the cotyledon stage. YE, yellow young leaves of *y/20* in the euphylla stage. GC, normal green leaves of WT in cotyledon stage. GE, normal green leaves of WT in the euphylla stage.

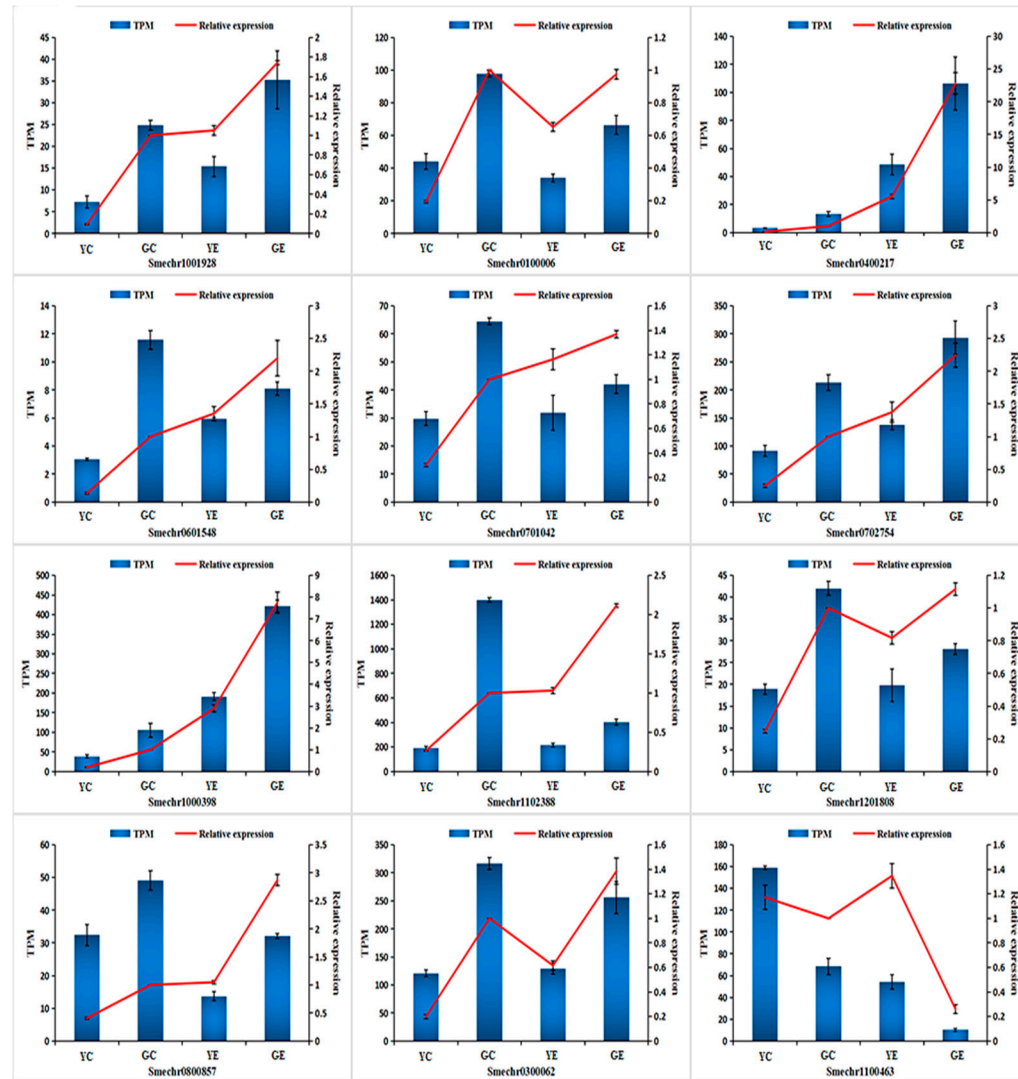

Supplement: s1 [file s1]
