# Supplementary material for: Cytological, Physiological, and Transcriptomic Analyses of the Leaf Color Mutant Yellow Leaf 20 (yl20) in Eggplant (Solanum melongena L.)
Source: Plants (Basel). 2024 Mar 15;13(6):855. doi: 10.3390/plants13060855 (PMC10974653; doi:10.3390/plants13060855)
Supplement: Supplementary file 1 [file plants-13-00855-s001.zip › Supplementary Tables-Plants3.14.xlsx]

## Sheet: Table S1
Table S1. Primers used in the reactions of qRT-PCR.
Target gene	Forward primers sequence(5'-3')	Revers primers sequence(5'-3')
Smechr1102388	CTCTGACAGCACCATACAA	GCCATAAGCAAGCCTAAA
Smechr0100006	ATGCCCTTTACAAGCAAT	CCAACTAACTTCACCACGA
Smechr1000398	GCTGAGACAGGGAAATGG	GCGACGCAAGGTCTAAAT
Smechr0601548	AATCTTGATATGCCAGTG	AATAAGTAGCCTTGCCTC
Smechr0400217	GGTATGGCAGTGGGTTTA	AGTTTCCTCGTGGTATCG
Smechr0702754	CACCGCTATCCTTCACTC	ATGCAGCAATGTAACTGG
Smechr0701042	CCTGTATCTGTCCGTTTG	TGTCCCAGCATTGTTTAT
Smechr1201808	ACCCGAGTTTACCCACCC	AAGGAGCAAGACGATGAGGACA
Smechr0800857	CCTTTCGTTTCTGTGCTG	ATGTTGCTTCCCTGTTTC
Smechr1100463	ATCCTCCGCCTTTACCAA	ACCCGAAACCAACTGTCC
Smechr0300062	TCAGTGGGAATGTGGATC	GGTATAACTCTAATGTGGCAAT
Smechr1001928	AAAAGCCAAGACATTCATAC	CAATTACTTCTGGTGGATAG
Actin	TTACTCATTCACCACCACAG	ACCATCGGGAAGCTCATAG

## Sheet: Table S2
Table S2. Analysis of content in differentially parameter of the growth in the plants of GE and YE.
Sample	Number of leaves	Leaf area (cm2)	Stem diameter (mm)	Plant height (cm)	Plant weight (g)	Root length(cm)	Root weight (g)
GE	4.9 b	105.767 b	3.183 a	6.03 a	4.391 a	16.35 a	1.841 a
YE	5.0 a	107.809 a	2.644 b	5.23 b	3.479 b	16.05 a	0.952 b
Note: Different letters denote significant differences according to Duncan’s test at the 0.05 level.

## Sheet: Table S3
Table S3. Quality and mapping statistics for samples.
Sample	Raw reads	Clean reads	Clean bases	Error rate(%)	Q20(%)	Q30(%)	GC content(%)	Total mapped	Multiple mapped	Uniquely mapped
GE1	51050464	50751686	7549193830	0.0246	98.22	94.48	44.04	49018663(96.59%)	3829955(7.55%)	45188708(89.04%)
GE2	50839822	50556814	7505420589	0.0246	98.22	94.47	43.94	48606632(96.14%)	3370364(6.67%)	45236268(89.48%)
GE3	46273236	46023524	6839508226	0.0247	98.18	94.39	43.85	44185877(96.01%)	3187355(6.93%)	40998522(89.08%)
GC1	54745490	54446578	8083575950	0.0245	98.28	94.63	44.23	52515523(96.45%)	3369307(6.19%)	49146216(90.27%)
GC2	51313404	51006104	7568194763	0.0247	98.18	94.38	44.13	49158438(96.38%)	3441826(6.75%)	45716612(89.63%)
GC3	48653054	48351676	7187689350	0.0248	98.15	94.31	44.25	46518744(96.21%)	3763565(7.78%)	42755179(88.43%)
YE1	52929832	52628530	7809151342	0.0249	98.11	94.2	43.79	50599671(96.14%)	3428833(6.52%)	47170838(89.63%)
YE2	53724860	53407940	7894197398	0.0248	98.14	94.26	44.03	51413550(96.27%)	3598945(6.74%)	47814605(89.53%)
YE3	45539156	45200828	6700983588	0.0248	98.15	94.31	43.7	43594052(96.45%)	3170922(7.02%)	40423130(89.43%)
YC1	50746480	50407790	7454363377	0.0248	98.13	94.29	44.14	48562940(96.34%)	3543579(7.03%)	45019361(89.31%)
YC2	49143146	48813076	7230736140	0.0247	98.2	94.43	43.64	47186856(96.67%)	3223053(6.6%)	43963803(90.07%)
YC3	48431154	48194474	7142220638	0.0247	98.18	94.36	43.75	46310172(96.09%)	2937411(6.09%)	43372761(90.0%)

## Sheet: Table S4
Table S4. Gene Ontology (GO) classification of DEGs in the cotyledon stage.
Number	GO ID	Term Type	Description	Ratio_in_study	Pvalue	Padjust
7	GO:0000427	CC	plastid-encoded plastid RNA polymerase complex	7/2671	5.7053e-08	0.000461901
44	GO:0010035	BP	response to inorganic substance	44/2671	2.04428e-06	0.000526527
52	GO:0042737	BP	drug catabolic process	52/2671	3.18412e-06	0.000526527
64	GO:0044262	BP	cellular carbohydrate metabolic process	64/2671	4.29976e-06	0.000526527
163	GO:0005975	BP	carbohydrate metabolic process	163/2671	4.39861e-06	0.000526527
11	GO:0042644	CC	chloroplast nucleoid	11/2671	1.53682e-07	0.000526527
15	GO:0009295	CC	nucleoid	15/2671	3.53712e-07	0.000526527
13	GO:0042646	CC	plastid nucleoid	13/2671	6.01869e-07	0.000526527
6	GO:0000229	CC	cytoplasmic chromosome	6/2671	6.18785e-07	0.000526527
6	GO:0009508	CC	plastid chromosome	6/2671	6.18785e-07	0.000526527
52	GO:0005618	CC	cell wall	52/2671	2.54763e-06	0.000526527
52	GO:0030312	CC	external encapsulating structure	52/2671	2.54763e-06	0.000526527
79	GO:0009451	BP	RNA modification	79/2671	6.31012e-06	0.000646667
79	GO:0004553	MF	hydrolase activity, hydrolyzing O-glycosyl compounds	79/2671	6.31012e-06	0.000646667
70	GO:0005976	BP	polysaccharide metabolic process	70/2671	6.76735e-06	0.000681835
83	GO:0016798	MF	hydrolase activity, acting on glycosyl bonds	83/2671	9.76802e-06	0.000842804
29	GO:0009657	BP	plastid organization	29/2671	1.02435e-05	0.000852238
45	GO:0006457	BP	protein folding	45/2671	1.03259e-05	0.000852238
13	GO:0042542	BP	response to hydrogen peroxide	13/2671	1.04361e-05	0.000852238
183	GO:0005886	CC	plasma membrane	183/2671	1.05053e-05	0.000852238
6	GO:0042793	BP	plastid transcription	6/2671	1.46979e-05	0.00113327
38	GO:0044042	BP	glucan metabolic process	38/2671	2.0294e-05	0.00151357
36	GO:0006073	BP	cellular glucan metabolic process	36/2671	2.03778e-05	0.00151357
50	GO:0016052	BP	carbohydrate catabolic process	50/2671	2.24896e-05	0.00165523
24	GO:0022836	MF	gated channel activity	24/2671	2.47825e-05	0.00180756
18	GO:0000302	BP	response to reactive oxygen species	18/2671	2.5509e-05	0.00184394
38	GO:0000272	BP	polysaccharide catabolic process	38/2671	2.95853e-05	0.00208281
47	GO:0006979	BP	response to oxidative stress	47/2671	3.40329e-05	0.00235496
88	GO:0009628	BP	response to abiotic stimulus	88/2671	4.08194e-05	0.00277709
75	GO:0016758	MF	transferase activity, transferring hexosyl groups	75/2671	5.04986e-05	0.00329707
25	GO:0009658	BP	chloroplast organization	25/2671	6.79787e-05	0.00409402
40	GO:1901615	BP	organic hydroxy compound metabolic process	40/2671	7.04902e-05	0.00417476
22	GO:0022839	MF	ion gated channel activity	22/2671	7.086e-05	0.00417476
15	GO:0006458	BP	'de novo' protein folding	15/2671	7.79017e-05	0.00453735
20	GO:0008202	BP	steroid metabolic process	20/2671	0.000146187	0.00794317
30	GO:0046527	MF	glucosyltransferase activity	30/2671	0.000153914	0.00825222
46	GO:0009532	CC	plastid stroma	46/2671	0.000157077	0.00831171
40	GO:0009755	BP	hormone-mediated signaling pathway	40/2671	0.000163741	0.00860809
29	GO:0072593	BP	reactive oxygen species metabolic process	29/2671	0.00017345	0.0090597
44	GO:0044264	BP	cellular polysaccharide metabolic process	44/2671	0.000184441	0.00957203
6	GO:0016554	BP	cytidine to uridine editing	6/2671	0.000189703	0.00978239
45	GO:0009570	CC	chloroplast stroma	45/2671	0.000236477	0.0121172
8	GO:0000373	BP	Group II intron splicing	8/2671	0.000239178	0.0121785
25	GO:0042445	BP	hormone metabolic process	25/2671	0.000245932	0.0124442
4	GO:0046113	BP	nucleobase catabolic process	4/2671	0.000336734	0.0165763
31	GO:0051082	MF	unfolded protein binding	31/2671	0.000334502	0.0165763
15	GO:0004724	MF	magnesium-dependent protein serine/threonine phosphatase activity	15/2671	0.000341928	0.0165763
15	GO:0043621	MF	protein self-association	15/2671	0.000341928	0.0165763
11	GO:0005982	BP	starch metabolic process	11/2671	0.000362433	0.0174658
21	GO:0009308	BP	amine metabolic process	21/2671	0.000373393	0.0177823
60	GO:0042578	MF	phosphoric ester hydrolase activity	60/2671	0.000381891	0.0179755
60	GO:0030246	MF	carbohydrate binding	60/2671	0.000422557	0.0197747
52	GO:0016791	MF	phosphatase activity	52/2671	0.000509512	0.0222974
6	GO:0005227	MF	calcium activated cation channel activity	6/2671	0.00059867	0.025781
5	GO:0045041	BP	protein import into mitochondrial intermembrane space	5/2671	0.00061462	0.0263278
20	GO:0042493	BP	response to drug	20/2671	0.000636923	0.0269975
26	GO:0006970	BP	response to osmotic stress	26/2671	0.000674405	0.0281442
8	GO:0009640	BP	photomorphogenesis	8/2671	0.000723411	0.0299454
7	GO:0009065	BP	glutamine family amino acid catabolic process	7/2671	0.000724963	0.0299454
3	GO:1901160	BP	primary amino compound metabolic process	3/2671	0.000787834	0.0322136
3	GO:0006562	BP	proline catabolic process	3/2671	0.000787834	0.0322136
22	GO:0004722	MF	protein serine/threonine phosphatase activity	22/2671	0.000883084	0.0357472
20	GO:0009072	BP	aromatic amino acid family metabolic process	20/2671	0.000896557	0.0357563
12	GO:0051259	BP	protein complex oligomerization	12/2671	0.000914139	0.0362788
114	GO:0003700	MF	DNA-binding transcription factor activity	114/2671	0.000922677	0.036439
22	GO:0009651	BP	response to salt stress	22/2671	0.000955919	0.0372365
30	GO:0016709	MF	oxidoreductase activity, acting on paired donors, with incorporation or reduction of molecular oxygen, NAD(P)H as one donor, and incorporation of one atom of oxygen	30/2671	0.000956668	0.0372365
18	GO:0009734	BP	auxin-activated signaling pathway	18/2671	0.000998697	0.0383197
8	GO:0022834	MF	ligand-gated channel activity	8/2671	0.000997847	0.0383197
8	GO:0015276	MF	ligand-gated ion channel activity	8/2671	0.000997847	0.0383197
116	GO:0043436	BP	oxoacid metabolic process	116/2671	0.00104431	0.0398809
1348	GO:0003824	MF	catalytic activity	1348/2671	0.00105677	0.0401671
14	GO:0061077	BP	chaperone-mediated protein folding	14/2671	0.00111325	0.0417264
51	GO:0071555	BP	cell wall organization	51/2671	0.0011191	0.0417524
5	GO:1901259	BP	chloroplast rRNA processing	5/2671	0.00113567	0.0421761
116	GO:0006082	BP	organic acid metabolic process	116/2671	0.0013114	0.0482594
15	GO:0046677	BP	response to antibiotic	15/2671	0.00135878	0.0495525
15	GO:0016125	BP	sterol metabolic process	15/2671	0.00135878	0.0495525
113	GO:0019752	BP	carboxylic acid metabolic process	113/2671	0.00136919	0.0497085

## Sheet: Table S5
Table S5. Three identified genes related to chloroplast.
gene_id	GE_TPM	GC_TPM	YE_TPM	YC_TPM	swissprot
Smechr1001928	35.31	24.8567	15.39	7.2067	sp|F4I0K2|SCKL2_ARATH(Fructokinase-like 2, chloroplastic OS=Arabidopsis thaliana OX=3702 GN=FLN2 PE=1 SV=2)
Smechr0101283	78.1	64.78	35.7667	19.1467	sp|M1A3D5|CITRX_SOLTU(Thioredoxin-like protein CITRX, chloroplastic OS=Solanum tuberosum OX=4113 GN=CITRX PE=3 SV=1)
Smechr1001472	35.14	39.9833	15.32	6.14	sp|Q9LU64|SODF2_ARATH(Superoxide dismutase [Fe] 2, chloroplastic OS=Arabidopsis thaliana OX=3702 GN=FSD2 PE=1 SV=1)

## Sheet: Table S6
Table S6. Gene Ontology (GO) classification of DEGs in the Venn.
Number	GO ID	Term Type	Description	Ratio_in_study	Pvalue	Padjust
7	GO:0042646	CC	plastid nucleoid	7/263	2.59e-08	0.000198584
8	GO:0009295	CC	nucleoid	8/263	6.28e-08	0.000198584
4	GO:0000229	CC	cytoplasmic chromosome	4/263	9.9e-08	0.000198584
4	GO:0009508	CC	plastid chromosome	4/263	9.9e-08	0.000198584
4	GO:0000427	CC	plastid-encoded plastid RNA polymerase complex	4/263	2.29e-07	0.000368034
6	GO:0042644	CC	chloroplast nucleoid	6/263	6.28e-07	0.0008404
31	GO:0009507	CC	chloroplast	31/263	8.95e-07	0.00102649
32	GO:0009536	CC	plastid	32/263	1.43e-06	0.00143495
11	GO:0006457	BP	protein folding	11/263	1.62e-05	0.0127754
107	GO:0043229	CC	intracellular organelle	107/263	1.75e-05	0.0127754
107	GO:0043226	CC	organelle	107/263	1.75e-05	0.0127754
3	GO:0042793	BP	plastid transcription	3/263	4.03e-05	0.026947
3	GO:1901259	BP	chloroplast rRNA processing	3/263	8.52e-05	0.0525868
7	GO:0009657	BP	plastid organization	7/263	0.000203704	0.116752
2	GO:0016630	MF	protochlorophyllide reductase activity	2/263	0.000245853	0.131515
5	GO:0003755	MF	peptidyl-prolyl cis-trans isomerase activity	5/263	0.000448246	0.224795
91	GO:0043231	CC	intracellular membrane-bounded organelle	91/263	0.000568228	0.268204
5	GO:0016859	MF	cis-trans isomerase activity	5/263	0.000654648	0.291828
3	GO:0000373	BP	Group II intron splicing	3/263	0.000756663	0.319551
3	GO:0015995	BP	chlorophyll biosynthetic process	3/263	0.00115204	0.355536
22	GO:0043228	CC	non-membrane-bounded organelle	22/263	0.000950744	0.355536
22	GO:0043232	CC	intracellular non-membrane-bounded organelle	22/263	0.000950744	0.355536
9	GO:0009570	CC	chloroplast stroma	9/263	0.001099	0.355536
9	GO:0009532	CC	plastid stroma	9/263	0.00112667	0.355536
2	GO:0009718	BP	anthocyanin-containing compound biosynthetic process	2/263	0.00120723	0.35589
5	GO:0046148	BP	pigment biosynthetic process	5/263	0.00127095	0.35589
4	GO:0033014	BP	tetrapyrrole biosynthetic process	4/263	0.00128624	0.35589
91	GO:0043227	CC	membrane-bounded organelle	91/263	0.00135589	0.362656
5	GO:0003724	MF	RNA helicase activity	5/263	0.00223675	0.560865
4	GO:0061077	BP	chaperone-mediated protein folding	4/263	0.00232619	0.565615
12	GO:0009451	BP	RNA modification	12/263	0.00264086	0.588619
7	GO:0050660	MF	flavin adenine dinucleotide binding	7/263	0.00274663	0.595649
2	GO:0046283	BP	anthocyanin-containing compound metabolic process	2/263	0.00284554	0.600859
2	GO:0016554	BP	cytidine to uridine editing	2/263	0.00429547	0.784902
2	GO:0000413	BP	protein peptidyl-prolyl isomerization	2/263	0.00429547	0.784902
2	GO:0009873	BP	ethylene-activated signaling pathway	2/263	0.00429547	0.784902
5	GO:0009658	BP	chloroplast organization	5/263	0.00439618	0.784902
5	GO:0042440	BP	pigment metabolic process	5/263	0.0048922	0.784902
26	GO:0016070	BP	RNA metabolic process	26/263	0.00691493	0.784902
2	GO:0009813	BP	flavonoid biosynthetic process	2/263	0.00698042	0.784902
4	GO:0033013	BP	tetrapyrrole metabolic process	4/263	0.00793632	0.784902
3	GO:0006779	BP	porphyrin-containing compound biosynthetic process	3/263	0.00796936	0.784902
1	GO:0090227	BP	regulation of red or far-red light signaling pathway	1/263	0.0090972	0.784902
1	GO:0090228	BP	positive regulation of red or far-red light signaling pathway	1/263	0.0090972	0.784902
1	GO:0032194	BP	ubiquinone biosynthetic process via 3,4-dihydroxy-5-polyprenylbenzoate	1/263	0.0090972	0.784902
1	GO:0043335	BP	protein unfolding	1/263	0.0090972	0.784902
1	GO:0009662	BP	etioplast organization	1/263	0.0090972	0.784902
1	GO:0042373	BP	vitamin K metabolic process	1/263	0.0090972	0.784902
1	GO:0042371	BP	vitamin K biosynthetic process	1/263	0.0090972	0.784902
1	GO:0043983	BP	histone H4-K12 acetylation	1/263	0.0090972	0.784902
1	GO:0051083	BP	'de novo' cotranslational protein folding	1/263	0.0090972	0.784902
4	GO:0000428	CC	DNA-directed RNA polymerase complex	4/263	0.00445739	0.784902
6	GO:0009941	CC	chloroplast envelope	6/263	0.0046186	0.784902
6	GO:0009526	CC	plastid envelope	6/263	0.00475199	0.784902
6	GO:0031975	CC	envelope	6/263	0.00866623	0.784902
6	GO:0031967	CC	organelle envelope	6/263	0.00866623	0.784902
2	GO:0032300	CC	mismatch repair complex	2/263	0.00909548	0.784902
1	GO:0033100	CC	NuA3 histone acetyltransferase complex	1/263	0.0090972	0.784902
1	GO:1990468	CC	NuA3b histone acetyltransferase complex	1/263	0.0090972	0.784902
1	GO:1990467	CC	NuA3a histone acetyltransferase complex	1/263	0.0090972	0.784902
1	GO:0070776	CC	MOZ/MORF histone acetyltransferase complex	1/263	0.0090972	0.784902
1	GO:0070775	CC	H3 histone acetyltransferase complex	1/263	0.0090972	0.784902
6	GO:0051082	MF	unfolded protein binding	6/263	0.00531402	0.784902
6	GO:0016709	MF	oxidoreductase activity, acting on paired donors, with incorporation or reduction of molecular oxygen, NAD(P)H as one donor, and incorporation of one atom of oxygen	6/263	0.00561261	0.784902
3	GO:0004784	MF	superoxide dismutase activity	3/263	0.00614825	0.784902
3	GO:0016721	MF	oxidoreductase activity, acting on superoxide radicals as acceptor	3/263	0.00614825	0.784902
4	GO:0042887	MF	amide transmembrane transporter activity	4/263	0.0061654	0.784902
7	GO:0016614	MF	oxidoreductase activity, acting on CH-OH group of donors	7/263	0.00662351	0.784902
11	GO:0016758	MF	transferase activity, transferring hexosyl groups	11/263	0.00709063	0.784902
4	GO:0043021	MF	ribonucleoprotein complex binding	4/263	0.00859344	0.784902
2	GO:0004652	MF	polynucleotide adenylyltransferase activity	2/263	0.00909548	0.784902
1	GO:0047063	MF	L-ascorbate-cytochrome-b5 reductase activity	1/263	0.0090972	0.784902
1	GO:0036033	MF	mediator complex binding	1/263	0.0090972	0.784902
1	GO:0045552	MF	dihydrokaempferol 4-reductase activity	1/263	0.0090972	0.784902
1	GO:0102218	MF	starch, H2O dikinase activity	1/263	0.0090972	0.784902
1	GO:0102216	MF	maltodextrin water dikinase	1/263	0.0090972	0.784902
1	GO:0051566	MF	anthocyanidin-3-glucoside rhamnosyltransferase activity	1/263	0.0090972	0.784902
1	GO:0033946	MF	xyloglucan-specific endo-beta-1,4-glucanase activity	1/263	0.0090972	0.784902
1	GO:0000721	MF	(R,R)-butanediol dehydrogenase activity	1/263	0.0090972	0.784902
1	GO:0034336	MF	misfolded RNA binding	1/263	0.0090972	0.784902
1	GO:0050521	MF	alpha-glucan, water dikinase activity	1/263	0.0090972	0.784902
1	GO:0033772	MF	flavonoid 3',5'-hydroxylase activity	1/263	0.0090972	0.784902
1	GO:0009383	MF	rRNA (cytosine-C5-)-methyltransferase activity	1/263	0.0090972	0.784902
1	GO:0043731	MF	6-hydroxynicotinate 3-monooxygenase activity	1/263	0.0090972	0.784902
4	GO:0030880	CC	RNA polymerase complex	4/263	0.00928516	0.792597
2	GO:0009812	BP	flavonoid metabolic process	2/263	0.0102468	0.865478
3	GO:0035673	MF	oligopeptide transmembrane transporter activity	3/263	0.0106484	0.890031
6	GO:0006364	BP	rRNA processing	6/263	0.0122187	1
3	GO:0015994	BP	chlorophyll metabolic process	3/263	0.0124766	1
2	GO:0016553	BP	base conversion or substitution editing	2/263	0.012731	1
9	GO:0005976	BP	polysaccharide metabolic process	9/263	0.0173014	1
6	GO:0016072	BP	rRNA metabolic process	6/263	0.0177026	1
1	GO:0034309	BP	primary alcohol biosynthetic process	1/263	0.0181119	1
1	GO:0106046	BP	guanine deglycation, glyoxal removal	1/263	0.0181119	1
1	GO:0106044	BP	guanine deglycation	1/263	0.0181119	1
1	GO:1903189	BP	glyoxal metabolic process	1/263	0.0181119	1
1	GO:0036525	BP	protein deglycation	1/263	0.0181119	1
1	GO:0036529	BP	protein deglycation, glyoxal removal	1/263	0.0181119	1
1	GO:0044154	BP	histone H3-K14 acetylation	1/263	0.0181119	1
1	GO:0046295	BP	glycolate biosynthetic process	1/263	0.0181119	1
1	GO:0043972	BP	histone H3-K23 acetylation	1/263	0.0181119	1
1	GO:0009441	BP	glycolate metabolic process	1/263	0.0181119	1
2	GO:0009690	BP	cytokinin metabolic process	2/263	0.0199457	1
2	GO:0045910	BP	negative regulation of DNA recombination	2/263	0.0199457	1
2	GO:0018208	BP	peptidyl-proline modification	2/263	0.0215518	1
2	GO:0031167	BP	rRNA methylation	2/263	0.0232096	1
2	GO:0034754	BP	cellular hormone metabolic process	2/263	0.0232096	1
2	GO:0051053	BP	negative regulation of DNA metabolic process	2/263	0.0249182	1
2	GO:0000018	BP	regulation of DNA recombination	2/263	0.0266765	1
1	GO:0043968	BP	histone H2A acetylation	1/263	0.027045	1
1	GO:0006828	BP	manganese ion transport	1/263	0.027045	1
1	GO:0070814	BP	hydrogen sulfide biosynthetic process	1/263	0.027045	1
1	GO:0010196	BP	nonphotochemical quenching	1/263	0.027045	1
1	GO:0046622	BP	positive regulation of organ growth	1/263	0.027045	1
1	GO:0070478	BP	nuclear-transcribed mRNA catabolic process, 3'-5' exonucleolytic nonsense-mediated decay	1/263	0.027045	1
1	GO:0048639	BP	positive regulation of developmental growth	1/263	0.027045	1
1	GO:0071421	BP	manganese ion transmembrane transport	1/263	0.027045	1
1	GO:1990066	BP	energy quenching	1/263	0.027045	1
1	GO:0006264	BP	mitochondrial DNA replication	1/263	0.027045	1
1	GO:0018160	BP	peptidyl-pyrromethane cofactor linkage	1/263	0.027045	1
5	GO:0006073	BP	cellular glucan metabolic process	5/263	0.0285538	1
3	GO:0006778	BP	porphyrin-containing compound metabolic process	3/263	0.035496	1
1	GO:0043982	BP	histone H4-K8 acetylation	1/263	0.0358971	1
1	GO:0006935	BP	chemotaxis	1/263	0.0358971	1
1	GO:0070681	BP	glutaminyl-tRNAGln biosynthesis via transamidation	1/263	0.0358971	1
1	GO:0051096	BP	positive regulation of helicase activity	1/263	0.0358971	1
1	GO:0043489	BP	RNA stabilization	1/263	0.0358971	1
1	GO:1902767	BP	isoprenoid biosynthetic process via mevalonate	1/263	0.0358971	1
1	GO:0001680	BP	tRNA 3'-terminal CCA addition	1/263	0.0358971	1
1	GO:0042780	BP	tRNA 3'-end processing	1/263	0.0358971	1
1	GO:1902369	BP	negative regulation of RNA catabolic process	1/263	0.0358971	1
1	GO:0010258	BP	NADH dehydrogenase complex (plastoquinone) assembly	1/263	0.0358971	1
1	GO:0050918	BP	positive chemotaxis	1/263	0.0358971	1
1	GO:0042330	BP	taxis	1/263	0.0358971	1
1	GO:0010183	BP	pollen tube guidance	1/263	0.0358971	1
1	GO:0010142	BP	farnesyl diphosphate biosynthetic process, mevalonate pathway	1/263	0.0358971	1
5	GO:0044042	BP	glucan metabolic process	5/263	0.0365375	1
2	GO:0006298	BP	mismatch repair	2/263	0.0382122	1
5	GO:0000272	BP	polysaccharide catabolic process	5/263	0.0399389	1
2	GO:0042542	BP	response to hydrogen peroxide	2/263	0.0424096	1
1	GO:0006572	BP	tyrosine catabolic process	1/263	0.0446689	1
1	GO:0090391	BP	granum assembly	1/263	0.0446689	1
1	GO:0051095	BP	regulation of helicase activity	1/263	0.0446689	1
2	GO:0000154	BP	rRNA modification	2/263	0.0467703	1
4	GO:0005694	CC	chromosome	4/263	0.0128437	1
1	GO:0032797	CC	SMN complex	1/263	0.0181119	1
1	GO:0005782	CC	peroxisomal matrix	1/263	0.0181119	1
1	GO:0031907	CC	microbody lumen	1/263	0.0181119	1
2	GO:1990391	CC	DNA repair complex	2/263	0.0183926	1
1	GO:0042645	CC	mitochondrial nucleoid	1/263	0.027045	1
1	GO:0055087	CC	Ski complex	1/263	0.027045	1
1	GO:0030956	CC	glutamyl-tRNA(Gln) amidotransferase complex	1/263	0.0358971	1
187	GO:0110165	CC	cellular anatomical entity	187/263	0.0437723	1
6	GO:0016616	MF	oxidoreductase activity, acting on the CH-OH group of donors, NAD or NADP as acceptor	6/263	0.012487	1
5	GO:0046527	MF	glucosyltransferase activity	5/263	0.0153734	1
25	GO:0003723	MF	RNA binding	25/263	0.0158088	1
1	GO:0070547	MF	L-tyrosine aminotransferase activity	1/263	0.0181119	1
1	GO:0048307	MF	ferredoxin-nitrite reductase activity	1/263	0.0181119	1
1	GO:0036524	MF	protein deglycase activity	1/263	0.0181119	1
1	GO:0048529	MF	magnesium-protoporphyrin IX monomethyl ester (oxidative) cyclase activity	1/263	0.0181119	1
1	GO:0016664	MF	oxidoreductase activity, acting on other nitrogenous compounds as donors, iron-sulfur protein as acceptor	1/263	0.0181119	1
1	GO:0004838	MF	L-tyrosine:2-oxoglutarate aminotransferase activity	1/263	0.0181119	1
2	GO:0140102	MF	catalytic activity, acting on a rRNA	2/263	0.0199457	1
2	GO:0022834	MF	ligand-gated channel activity	2/263	0.0199457	1
2	GO:0015276	MF	ligand-gated ion channel activity	2/263	0.0199457	1
2	GO:0008649	MF	rRNA methyltransferase activity	2/263	0.0199457	1
2	GO:0016615	MF	malate dehydrogenase activity	2/263	0.0232096	1
3	GO:0008173	MF	RNA methyltransferase activity	3/263	0.0260633	1
3	GO:1904680	MF	peptide transmembrane transporter activity	3/263	0.0270351	1
1	GO:0015505	MF	uracil:cation symporter activity	1/263	0.027045	1
1	GO:0003977	MF	UDP-N-acetylglucosamine diphosphorylase activity	1/263	0.027045	1
1	GO:0004020	MF	adenylylsulfate kinase activity	1/263	0.027045	1
1	GO:0098599	MF	palmitoyl hydrolase activity	1/263	0.027045	1
1	GO:0000179	MF	rRNA (adenine-N6,N6-)-dimethyltransferase activity	1/263	0.027045	1
1	GO:0005274	MF	allantoin:proton symporter activity	1/263	0.027045	1
1	GO:0098809	MF	nitrite reductase activity	1/263	0.027045	1
1	GO:0004148	MF	dihydrolipoyl dehydrogenase activity	1/263	0.027045	1
1	GO:0016434	MF	rRNA (cytosine) methyltransferase activity	1/263	0.027045	1
1	GO:0004418	MF	hydroxymethylbilane synthase activity	1/263	0.027045	1
1	GO:0003844	MF	1,4-alpha-glucan branching enzyme activity	1/263	0.027045	1
1	GO:0015391	MF	nucleobase:cation symporter activity	1/263	0.027045	1
2	GO:0030983	MF	mismatched DNA binding	2/263	0.0303379	1
7	GO:0008194	MF	UDP-glycosyltransferase activity	7/263	0.0316212	1
2	GO:0070566	MF	adenylyltransferase activity	2/263	0.032239	1
2	GO:0080043	MF	quercetin 3-O-glucosyltransferase activity	2/263	0.032239	1
2	GO:0080044	MF	quercetin 7-O-glucosyltransferase activity	2/263	0.032239	1
2	GO:0016668	MF	oxidoreductase activity, acting on a sulfur group of donors, NAD(P) as acceptor	2/263	0.0341858	1
5	GO:0044877	MF	protein-containing complex binding	5/263	0.0352289	1
1	GO:0016971	MF	flavin-linked sulfhydryl oxidase activity	1/263	0.0358971	1
1	GO:0016972	MF	thiol oxidase activity	1/263	0.0358971	1
1	GO:0004748	MF	ribonucleoside-diphosphate reductase activity, thioredoxin disulfide as acceptor	1/263	0.0358971	1
1	GO:0052723	MF	inositol hexakisphosphate 1-kinase activity	1/263	0.0358971	1
1	GO:0052724	MF	inositol hexakisphosphate 3-kinase activity	1/263	0.0358971	1
1	GO:0061731	MF	ribonucleoside-diphosphate reductase activity	1/263	0.0358971	1
1	GO:0000832	MF	inositol hexakisphosphate 5-kinase activity	1/263	0.0358971	1
1	GO:0033857	MF	diphosphoinositol-pentakisphosphate kinase activity	1/263	0.0358971	1
1	GO:0004413	MF	homoserine kinase activity	1/263	0.0358971	1
1	GO:0052928	MF	CTP:3'-cytidine-tRNA cytidylyltransferase activity	1/263	0.0358971	1
1	GO:0052929	MF	ATP:3'-cytidine-cytidine-tRNA adenylyltransferase activity	1/263	0.0358971	1
1	GO:0050567	MF	glutaminyl-tRNA synthase (glutamine-hydrolyzing) activity	1/263	0.0358971	1
1	GO:0016781	MF	phosphotransferase activity, paired acceptors	1/263	0.0358971	1
1	GO:0000828	MF	inositol hexakisphosphate kinase activity	1/263	0.0358971	1
1	GO:0016728	MF	oxidoreductase activity, acting on CH or CH2 groups, disulfide as acceptor	1/263	0.0358971	1
1	GO:0102092	MF	5-diphosphoinositol pentakisphosphate 3-kinase activity	1/263	0.0358971	1
2	GO:0016762	MF	xyloglucan:xyloglucosyl transferase activity	2/263	0.0424096	1
1	GO:0004421	MF	hydroxymethylglutaryl-CoA synthase activity	1/263	0.0446689	1
1	GO:0005350	MF	pyrimidine nucleobase transmembrane transporter activity	1/263	0.0446689	1
1	GO:1990817	MF	RNA adenylyltransferase activity	1/263	0.0446689	1
1	GO:0004709	MF	MAP kinase kinase kinase activity	1/263	0.0446689	1
1	GO:0005047	MF	signal recognition particle binding	1/263	0.0446689	1
1	GO:0016433	MF	rRNA (adenine) methyltransferase activity	1/263	0.0446689	1
1	GO:0000829	MF	inositol heptakisphosphate kinase activity	1/263	0.0446689	1
1	GO:0015210	MF	uracil transmembrane transporter activity	1/263	0.0446689	1
1	GO:0004810	MF	tRNA adenylyltransferase activity	1/263	0.0446689	1
16	GO:0140110	MF	transcription regulator activity	16/263	0.0455612	1
4	GO:0016667	MF	oxidoreductase activity, acting on a sulfur group of donors	4/263	0.0495239	1

## Sheet: Table S7
Table S7. Kyoto Encyclopedia of Genes and Genomes (KEGG) passways of DEGs in the Venn.
Num	Pathway id	Description	Database	Ratio_in_study	Pvalue	Padjust
2	map00944	Flavone and flavonol biosynthesis	KEGG PATHWAY	2/107	0.000910493	0.0528086
3	map00860	Porphyrin and chlorophyll metabolism	KEGG PATHWAY	3/107	0.0118756	0.229594
4	map00630	Glyoxylate and dicarboxylate metabolism	KEGG PATHWAY	4/107	0.0168199	0.243888
4	map04146	Peroxisome	KEGG PATHWAY	4/107	0.0109076	0.31632
1	map00072	Synthesis and degradation of ketone bodies	KEGG PATHWAY	1/107	0.0689894	0.363762
2	map00220	Arginine biosynthesis	KEGG PATHWAY	2/107	0.0453542	0.375792
3	map00620	Pyruvate metabolism	KEGG PATHWAY	3/107	0.0590701	0.380674
2	map00130	Ubiquinone and other terpenoid-quinone biosynthesis	KEGG PATHWAY	2/107	0.0863237	0.385136
2	map04712	Circadian rhythm - plant	KEGG PATHWAY	2/107	0.0816121	0.394459
5	map04141	Protein processing in endoplasmic reticulum	KEGG PATHWAY	5/107	0.0687199	0.398576
4	map00500	Starch and sucrose metabolism	KEGG PATHWAY	4/107	0.0562959	0.408145
3	map00941	Flavonoid biosynthesis	KEGG PATHWAY	3/107	0.0448047	0.433113
2	map00910	Nitrogen metabolism	KEGG PATHWAY	2/107	0.0379794	0.440561
2	map00020	Citrate cycle (TCA cycle)	KEGG PATHWAY	2/107	0.108466	0.449358
2	map00280	Valine, leucine and isoleucine degradation	KEGG PATHWAY	2/107	0.118745	0.459145
1	map00945	Stilbenoid, diarylheptanoid and gingerol biosynthesis	KEGG PATHWAY	1/107	0.466935	0.601828
1	map00970	Aminoacyl-tRNA biosynthesis	KEGG PATHWAY	1/107	0.449633	0.620921
1	map00310	Lysine degradation	KEGG PATHWAY	1/107	0.408642	0.623716
1	map00330	Arginine and proline metabolism	KEGG PATHWAY	1/107	0.462661	0.624054
1	map00240	Pyrimidine metabolism	KEGG PATHWAY	1/107	0.462661	0.624054
1	map00900	Terpenoid backbone biosynthesis	KEGG PATHWAY	1/107	0.431774	0.626072
1	map00380	Tryptophan metabolism	KEGG PATHWAY	1/107	0.431774	0.626072
1	map00908	Zeatin biosynthesis	KEGG PATHWAY	1/107	0.403904	0.633147
1	map00360	Phenylalanine metabolism	KEGG PATHWAY	1/107	0.42722	0.635354
1	map00260	Glycine, serine and threonine metabolism	KEGG PATHWAY	1/107	0.50392	0.635378
3	map04626	Plant-pathogen interaction	KEGG PATHWAY	3/107	0.518282	0.639582
4	map03010	Ribosome	KEGG PATHWAY	4/107	0.539217	0.651554
1	map04070	Phosphatidylinositol signaling system	KEGG PATHWAY	1/107	0.556461	0.658668
1	map00250	Alanine, aspartate and glutamate metabolism	KEGG PATHWAY	1/107	0.39913	0.661415
1	map00350	Tyrosine metabolism	KEGG PATHWAY	1/107	0.39913	0.661415
1	map00400	Phenylalanine, tyrosine and tryptophan biosynthesis	KEGG PATHWAY	1/107	0.394317	0.672658
1	map00564	Glycerophospholipid metabolism	KEGG PATHWAY	1/107	0.609784	0.680144
1	map04145	Phagosome	KEGG PATHWAY	1/107	0.600295	0.682688
3	map04016	MAPK signaling pathway - plant	KEGG PATHWAY	3/107	0.392705	0.690208
3	map04075	Plant hormone signal transduction	KEGG PATHWAY	3/107	0.596339	0.691753
1	map03018	RNA degradation	KEGG PATHWAY	1/107	0.642709	0.703342
1	map00052	Galactose metabolism	KEGG PATHWAY	1/107	0.384576	0.71953
1	map00460	Cyanoamino acid metabolism	KEGG PATHWAY	1/107	0.384576	0.71953
1	map00920	Sulfur metabolism	KEGG PATHWAY	1/107	0.260772	0.720228
1	map00950	Isoquinoline alkaloid biosynthesis	KEGG PATHWAY	1/107	0.260772	0.720228
3	map00940	Phenylpropanoid biosynthesis	KEGG PATHWAY	3/107	0.379824	0.734326
2	map00480	Glutathione metabolism	KEGG PATHWAY	2/107	0.254132	0.736983
2	map00270	Cysteine and methionine metabolism	KEGG PATHWAY	2/107	0.32436	0.752515
1	map03015	mRNA surveillance pathway	KEGG PATHWAY	1/107	0.705295	0.75754
1	map00010	Glycolysis / Gluconeogenesis	KEGG PATHWAY	1/107	0.719163	0.75839
1	map00960	Tropane, piperidine and pyridine alkaloid biosynthesis	KEGG PATHWAY	1/107	0.300858	0.758686
1	map00062	Fatty acid elongation	KEGG PATHWAY	1/107	0.248907	0.759821
2	map00040	Pentose and glucuronate interconversions	KEGG PATHWAY	2/107	0.315635	0.762786
1	map00061	Fatty acid biosynthesis	KEGG PATHWAY	1/107	0.369674	0.765754
1	map03060	Protein export	KEGG PATHWAY	1/107	0.369674	0.765754
2	map00230	Purine metabolism	KEGG PATHWAY	2/107	0.213253	0.773043
2	map00710	Carbon fixation in photosynthetic organisms	KEGG PATHWAY	2/107	0.213253	0.773043
1	map00520	Amino sugar and nucleotide sugar metabolism	KEGG PATHWAY	1/107	0.74703	0.77371
1	map00650	Butanoate metabolism	KEGG PATHWAY	1/107	0.242903	0.782689
1	map00640	Propanoate metabolism	KEGG PATHWAY	1/107	0.364628	0.783275
2	map04120	Ubiquitin mediated proteolysis	KEGG PATHWAY	2/107	0.356088	0.79435
1	map03430	Mismatch repair	KEGG PATHWAY	1/107	0.791473	0.805358
1	map00195	Photosynthesis	KEGG PATHWAY	1/107	0.948735	0.948735
